# Supplementary material
Source: Research Square preprint supplement (doi:10.21203/rs.3.rs-9287896/v1)
Supplement: Supplementary file 1 [file d6e6353eb253c041a52b517f.docx]

**Integrated bulk and single-cell transcriptomic analysis reveals a tryptophan metabolism-driven prognostic signature and therapeutic landscape in triple-negative breast cancer**

Youjun Wu，Xiaorong Pang，Feng Cen，Lingna Tang，Xiang Feng，Xianglan Mo

Functional & Integrative Genomics

Correspondence: Xianglan Mo Department of Pathology, The People’s Hospital of Guangxi Zhuang Autonomous Region, Guangxi Academy of Medical Sciences, Nanning, Guangxi, China [moxianglan@21cn.com](mailto:moxianglan@21cn.com)

**Figure S1**

**
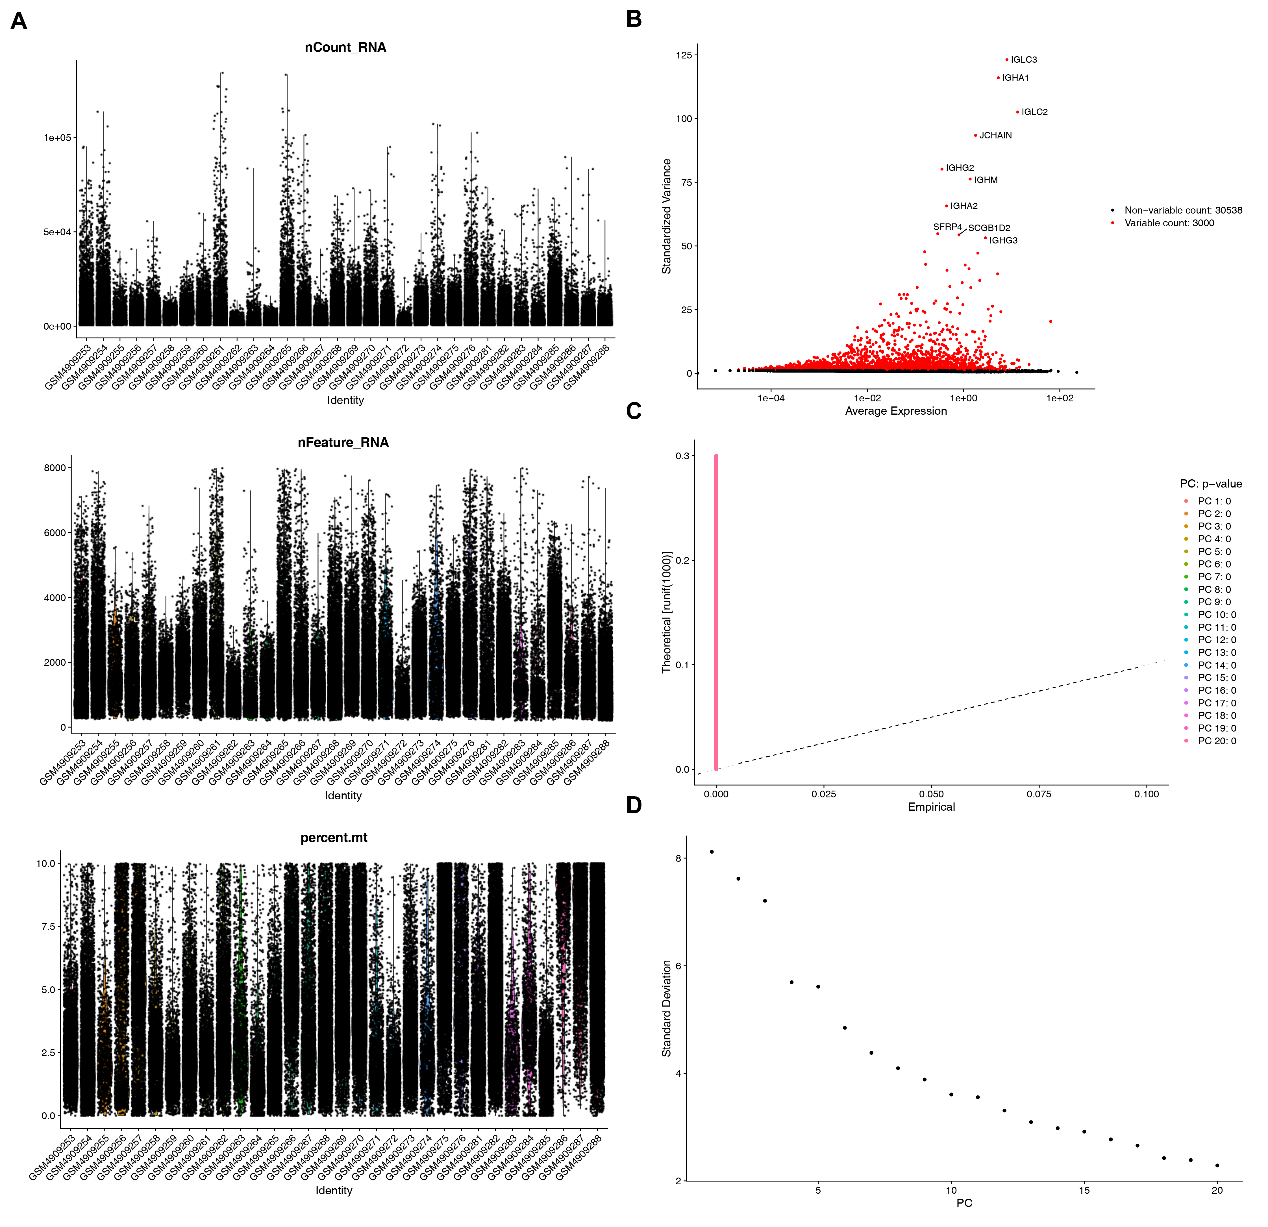
**

**Table S1**
